# Supplementary material for: Spectroscopic and Molecular Docking Studies of Cu(II), Ni(II), Co(II), and Mn(II) Complexes with Anticonvulsant Therapeutic Agent Gabapentin
Source: MDPI journal article supplement (doi:10.3390/molecules27134311), 2022-07-05
Supplement: s1 [file s1]

## Supplementary Data

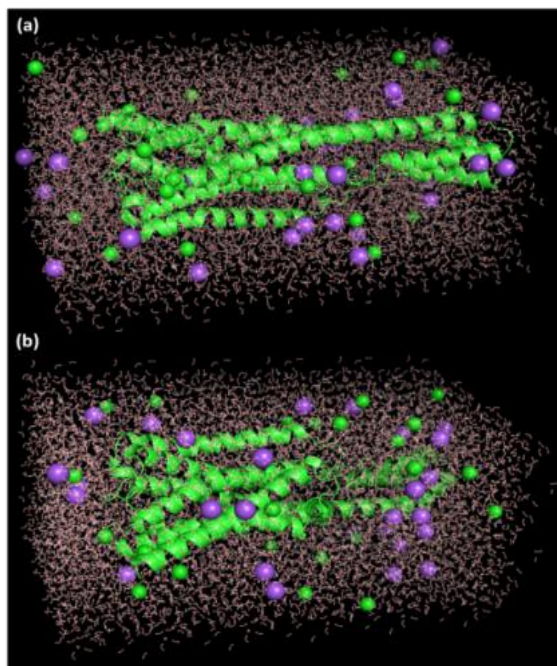

**Figure S1.** Receptor-ligand complex (a) CuGS and (b) GpnS in triclinic box solvated with water molecules and neutralized with 28 Na<sup>+</sup> and 27 Cl<sup>-</sup> ions (0.15 M salt).

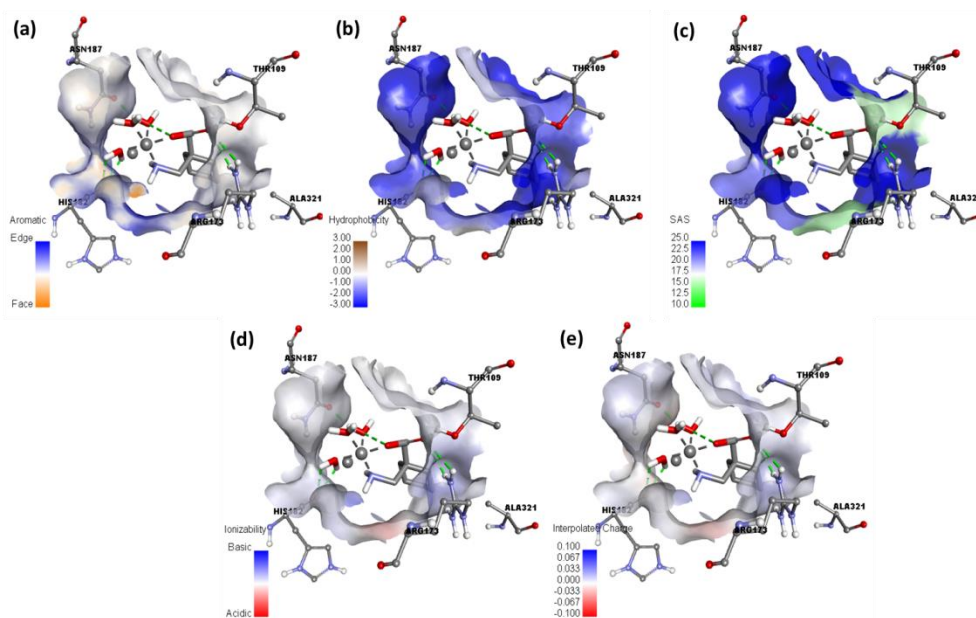

**Figure S2.** Representation of (a) aromatic surface, (b) hydrophobic surface, (c) solvent accessible surface, (d) ionizability surface, and (e) Interpolated charge; between serotonin and metal complex [Cu(II)-(Gpn)].
